# Supplementary material for: A benzophenoxazine-based NIR fluorescent probe for the detection of hydrogen sulfide and imaging in living cells
Source: Royal Society of Chemistry journal article supplement (doi:10.1039/d2an01256a), 2022-01-01
Supplement: d2an01256a1.pdf [file d2an01256a1.pdf]

## Supporting information

### **Benzophenoxazine-based NIR fluorescent probe for the detection of hydrogen sulfide and imaging in living cells**

Wenzhu Yin,<sup>\*a</sup> Hongjing Wang,<sup>b</sup> Fang Ma,<sup>a</sup> Zeyu Xu,<sup>c</sup> Yu Lu,<sup>\*a,c</sup> Mingxu Zhou,<sup>a</sup> Bihua Deng,<sup>a</sup>  
Haiyan Wang<sup>a</sup> and Jinqiu Zhang<sup>\*a,c</sup>

<sup>a</sup>Institute of Veterinary Immunology & Engineering, National Research Center of Engineering and Technology for Veterinary Biologicals, Jiangsu Key Laboratory for Food Quality and Safety-State Key Laboratory Cultivation Base, Ministry of Science and Technology, Jiangsu Academy of Agricultural Sciences, Nanjing 210014, P. R. China; <sup>b</sup> College of Chemistry and Environmental Science, YiLi Normal University, Yining 835000, PR China; <sup>c</sup> College of Veterinary Medicine, Nanjing Agricultural University, Nanjing 210095, P. R. China

#### **Corresponding Author**

Wenzhu Yin — <sup>a</sup>Institute of Veterinary Immunology & Engineering, National Research Center of Engineering and Technology for Veterinary Biologicals, Jiangsu Key Laboratory for Food Quality and Safety-State Key Laboratory Cultivation Base, Ministry of Science and Technology, Jiangsu Academy of Agricultural Sciences, Nanjing 210014, P. R. China;

E-mail: [m18805157895@163.com](mailto:m18805157895@163.com)

Yu Lu — <sup>a</sup>Institute of Veterinary Immunology & Engineering, National Research Center of Engineering and Technology for Veterinary Biologicals, Jiangsu Key Laboratory for Food Quality and Safety-State Key Laboratory Cultivation Base, Ministry of Science and Technology, Jiangsu Academy of Agricultural Sciences, Nanjing 210014, P. R. China; <sup>c</sup>College of Veterinary Medicine, Nanjing Agricultural University, Nanjing 210095, P. R. China; E-mail: [luyu201710@163.com](mailto:luyu201710@163.com)

Jinqiu Zhang — <sup>a</sup>Institute of Veterinary Immunology & Engineering, National Research Center of Engineering and Technology for Veterinary Biologicals, Jiangsu Key Laboratory for Food Quality and Safety-State Key Laboratory Cultivation Base, Ministry of Science and Technology, Jiangsu Academy of Agricultural Sciences, Nanjing 210014, P. R. China; <sup>c</sup>College of Veterinary Medicine, Nanjing Agricultural University, Nanjing 210095, P. R. China; E-mail: [jqzh03@126.com](mailto:jqzh03@126.com)

## Contents

|                                                                                                                                                                                                                      |      |
|----------------------------------------------------------------------------------------------------------------------------------------------------------------------------------------------------------------------|------|
| Related Synthesis and Characterization.                                                                                                                                                                              | p3-4 |
| Figure S1. ESI-MS of intermediate NR (positive ion mode).                                                                                                                                                            | p5   |
| Figure S2. <sup>1</sup> H NMR of intermediate NR in DMSO-d <sub>6</sub> .                                                                                                                                            | p5   |
| Figure S3. ESI-HRMS of NRDNP.                                                                                                                                                                                        | p6   |
| Figure S4. <sup>1</sup> H NMR of NRDNP in CDCl <sub>3</sub> .                                                                                                                                                        | p6   |
| Figure S5. <sup>13</sup> C NMR of NRDNP in CDCl <sub>3</sub> .                                                                                                                                                       | p7   |
| Figure S6. UV-vis spectra for stability analyses of NRDNP in different time. (A) with natural place; (B) under ultraviolet lamp irradiation.                                                                         | p7   |
| Figure S7. Fluorescence intensity of NRDNP (5 μM) with / without Na <sub>2</sub> S (50 μM) at 612 nm in different pH conditions.                                                                                     | p8   |
| Figure S8. Relative quantum yield of NRDNP (Φ) measurement using Rhodamine B as reference.                                                                                                                           | p8   |
| Figure S9. (A) Time dependent absorbance changes of probe NRDNP (10 μM) with 100 μM Na <sub>2</sub> S in 10 mM PBS (10 % DMSO with 0.1% CTAB) at pH = 7.4; (B) Pictures of absorbance (A) at 582 nm versus time (t). | p9   |
| Figure S10. Fluorescence intensity of NRDNP (2 μM) upon the addition Na <sub>2</sub> S (20 μM) in the presence of 20 μM various other species.                                                                       | p9   |
| Figure S11. ESI-MS of NRDNP + S <sup>2-</sup> (Negative ion mode).                                                                                                                                                   | p10  |
| Figure S12. Cell viability experiments by standard CCK-8 assay using RAW264.7 cells for NRDNP.                                                                                                                       | p10  |
| Figure S13. Flow cytometry study.                                                                                                                                                                                    | p11  |

### **Synthesis of 4-nitrosobenzene-1,3-diol**

For synthesizing compound 4-nitrosobenzene-1,3-diol, 350 mL of ice water and 6.3 mL of concentrated sulfuric acid were added in a 1000 mL round bottom flask, and a mixture of resorcinol (14.5 g, 0.13 M) and sodium nitrite (10.8 g, 0.15 M) was added into the round bottom flask and thoroughly mixed with constant magnetic stirring. The whole process temperature was maintained at 0 - 5 °C, keeping reaction for 20 min. Then, the temperature was raised to 8 - 15 °C, and water was added to make the volume up to 550 mL, filtered, washed with water and dried to obtain the product (17.93 g; yield, 96%).

### **Synthesis of NR**

At room temperature, 4-nitrosobenzene-1,3-diol (0.153 g, 1.1 mM) and 1-naphthol (0.144 g, 1 mM) were added to 5 mL of DMF in the reaction bottle and stirred evenly. Then, 3 mL of hydrochloric acid was added dropwise to the reaction bottle. After the overnight reaction, the product was purified through silica gel chromatography using a mixture of methanol and dichloromethane (v/v = 1:30) as the mobile phase, which afforded NR as a red solid (130 mg, 49%). <sup>1</sup>H NMR (400 MHz, DMSO-d<sub>6</sub>) δ 10.88 (s, 1H), 8.61 (d, J = 7.7 Hz, 1H), 8.15 (d, J = 7.5 Hz, 1H), 7.81 (ddd, J = 28.5, 17.8, 7.7 Hz, 3H), 7.02 - 6.67 (m, 2H), 6.39 (s, 1H).

MS (ESI-MS, position mode, m/z) Calcd for C<sub>16</sub>H<sub>10</sub>N<sub>2</sub>O<sub>2</sub> [M + H]<sup>+</sup>: 264.07, found: 263.95.

### **Photostability**

To investigate the photostability of the probe system, the UV-vis absorption spectra of NRDNP in PBS solution were monitored by a UV-vis spectrophotometer, upon continuous irradiation with a UV lamp (20 W). The photostability of NRDNP was demonstrated by plotting A versus t, where A is the absorbance of NRDNP and t is irradiation time.

### **Determination of Limit of Detection**

The Limit of Detection (LOD) was calculated according to the formula  $LOD = 3\sigma/k$ . In this formula,  $\sigma$  was the standard deviation of the blank which was obtained through 11

times tests of the probe in buffer, and  $k$  was the slope of the calibration curve. The coefficient 3 was according to the Compendium of Analytical Nomenclature (IUPAC) standard.

### **Kinetic studies**

The reaction of NRDNP (10  $\mu\text{M}$ ) with  $\text{Na}_2\text{S}$  100  $\mu\text{M}$ ) in pH 7.4 PBS buffer (containing 10 % DMSO as co-solvent) was monitored using the absorbance ( $A$ ) at 582 nm. The pseudo-first-order rate constant for the reaction was determined by fitting the  $A$  of the samples to the pseudo-first-order equation:

$$\text{Ln} [(A_{\text{max}} - A_t) / A_{\text{max}}] = k_t$$

where  $A_t$  and  $A_{\text{max}}$  are the absorbance at 582 nm at time  $t$  and the maximum absorbance obtained after the reaction was complete, respectively.  $k$  is the pseudo-first-order rate constant. The pseudo-first-order plot for the reaction of NRDNP with 10 equivalents  $\text{Na}_2\text{S}$  is shown in Fig. S9B. The slope of the line provides the pseudo-first-order rate constant.

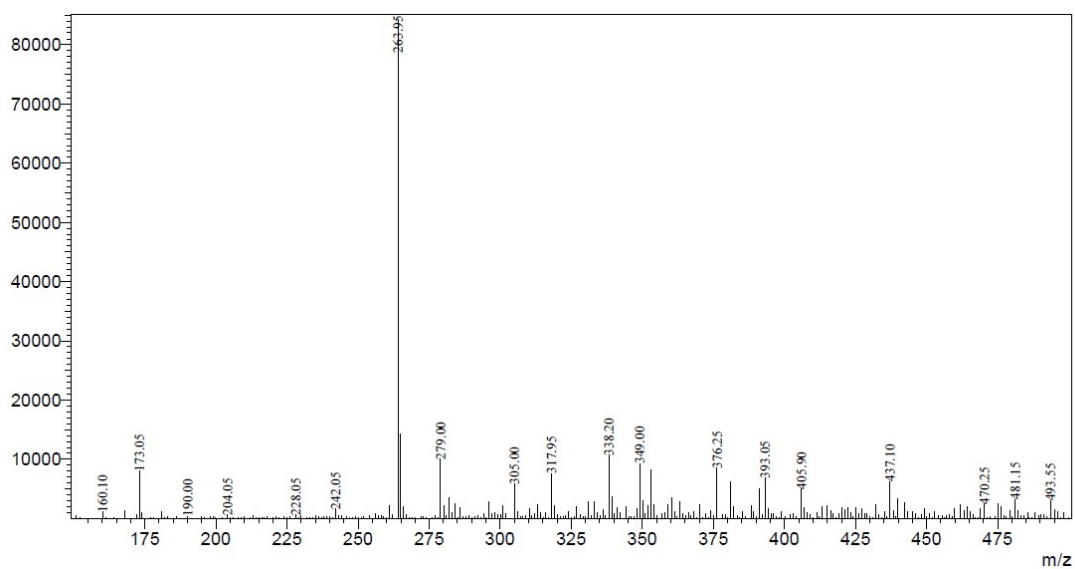

Figure S1. ESI-MS of intermediate NR (positive ion mode).

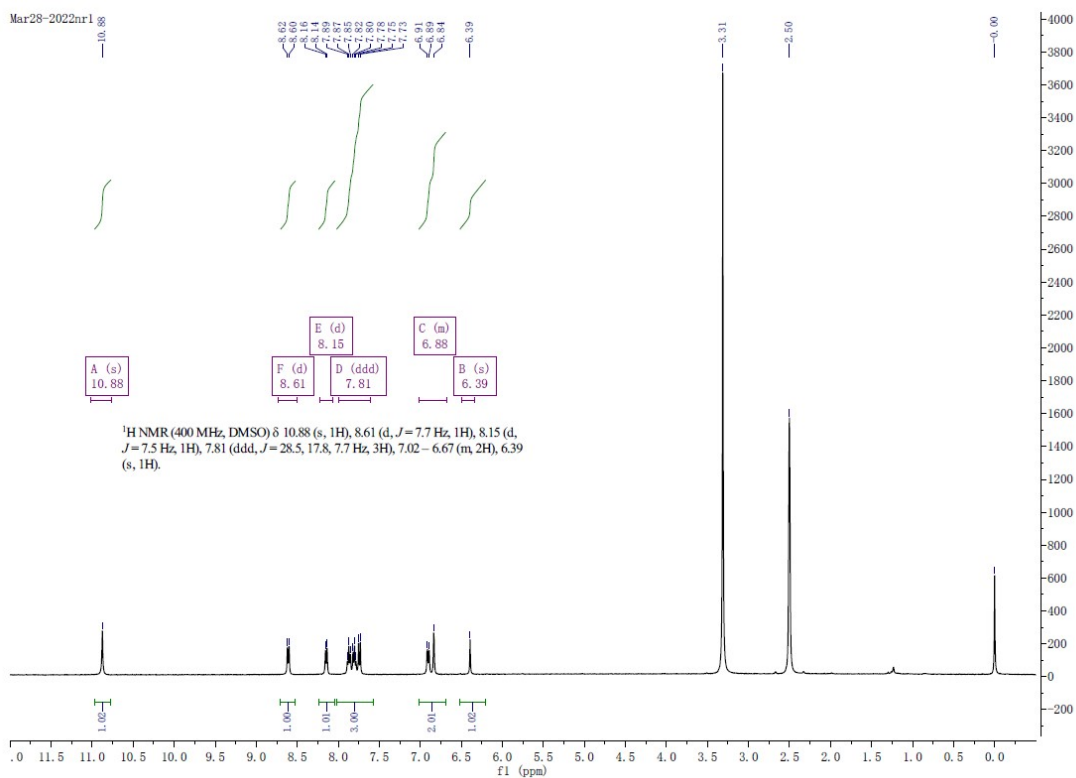

Figure S2. <sup>1</sup>H NMR of intermediate NR in DMSO-d<sub>6</sub>.



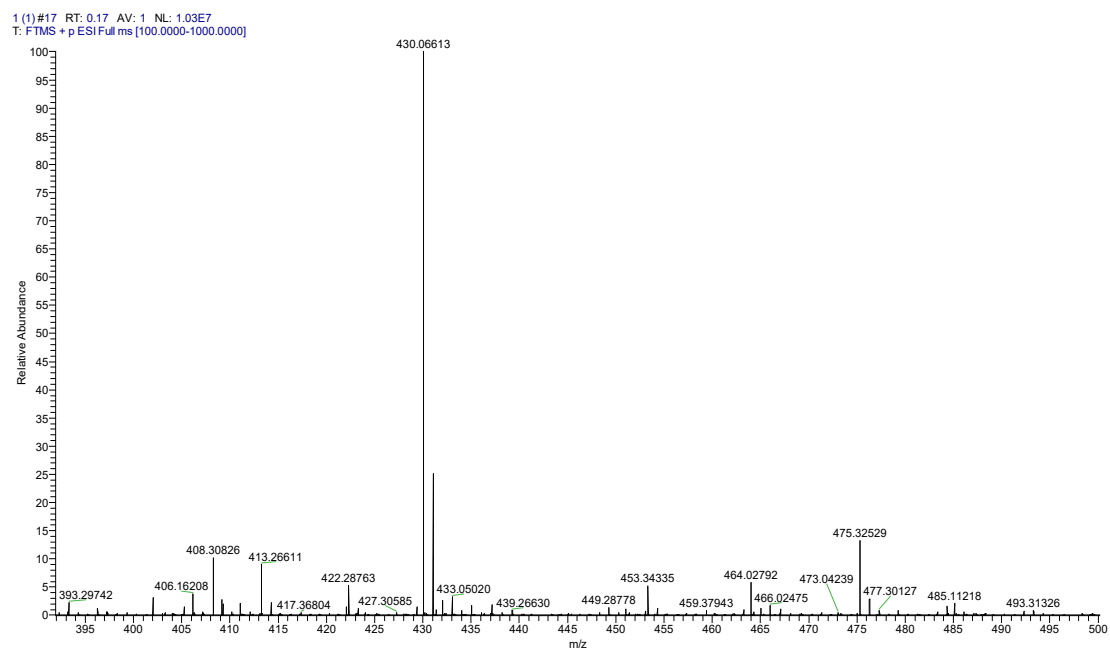

Figure S3. ESI-HRMS of NRDNP.

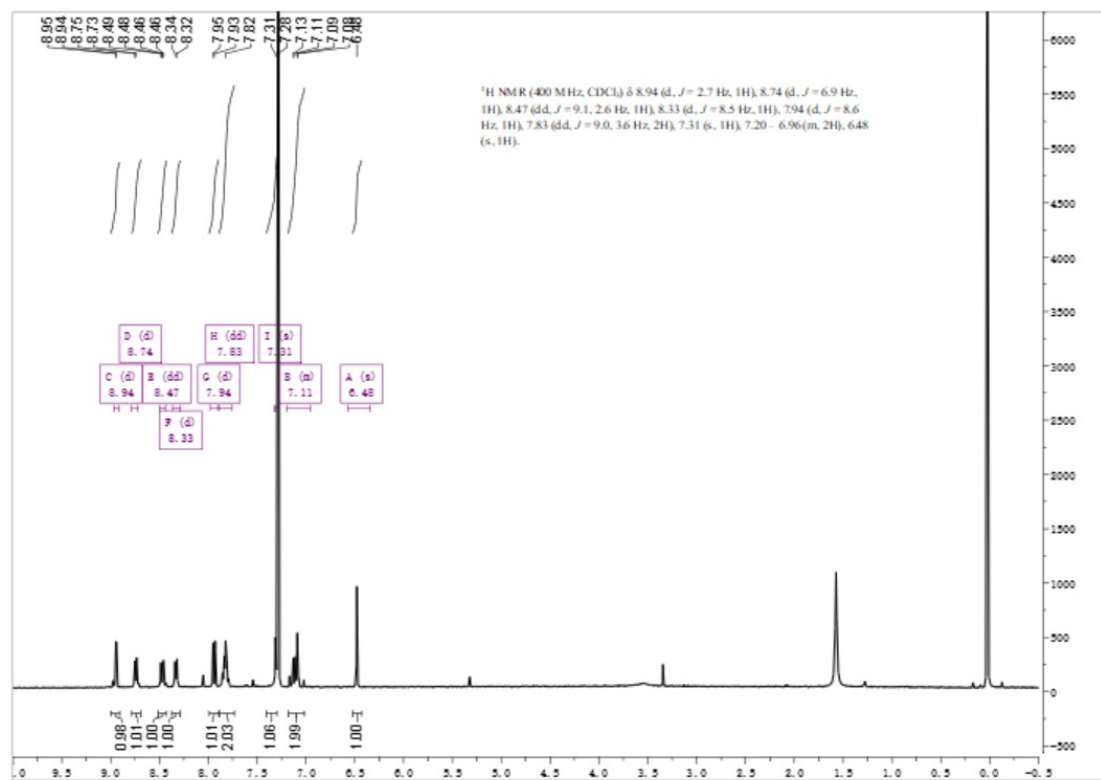

Figure S4. <sup>1</sup>H NMR of NRDNP in CDCl<sub>3</sub>.

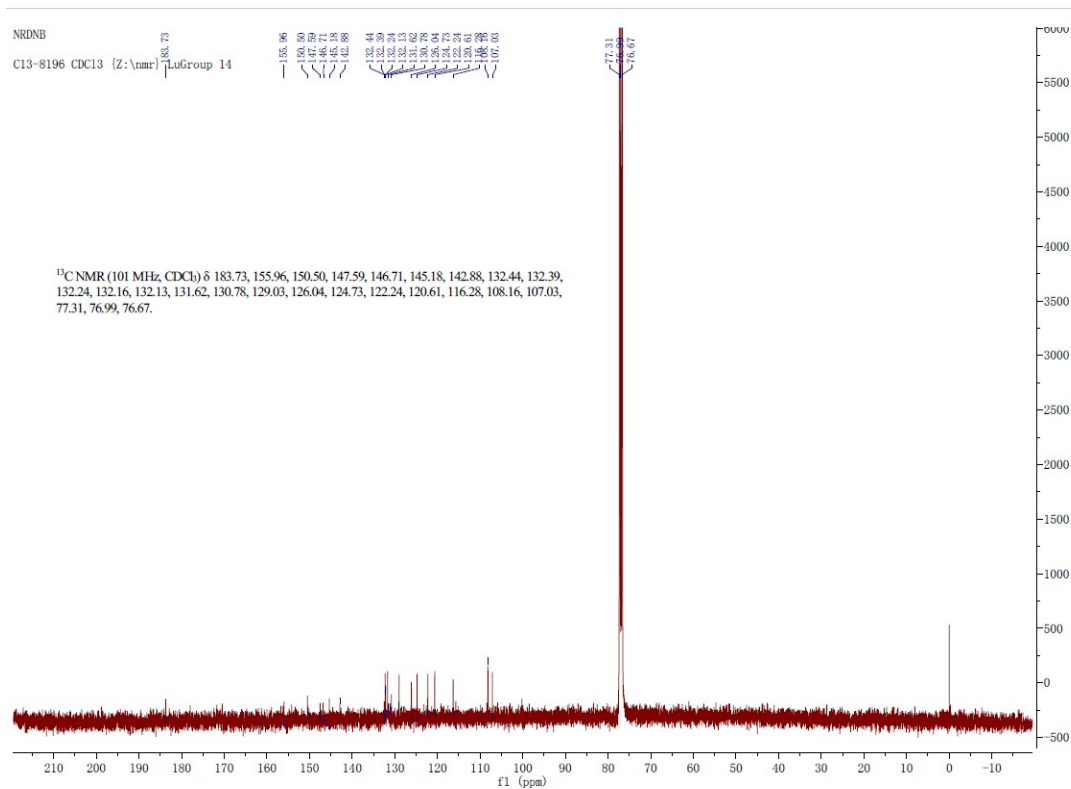

Figure S5.  $^{13}\text{C}$  NMR of NRDNP in  $\text{CDCl}_3$ .

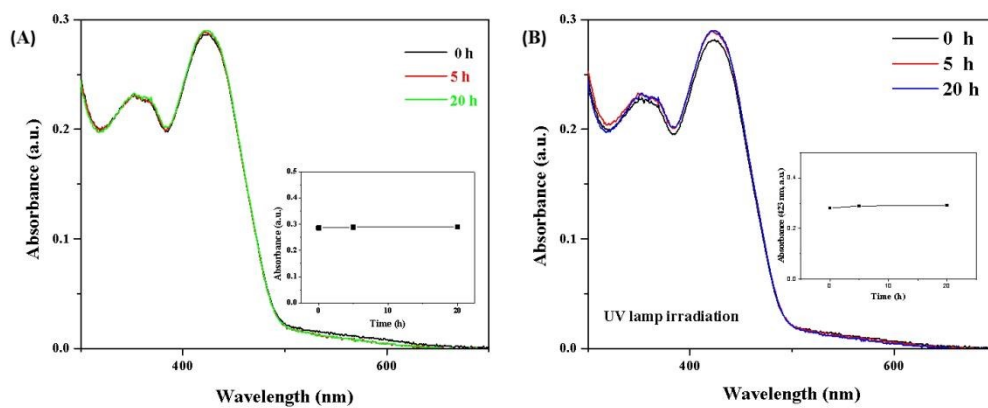

Figure S6. UV-vis spectra for stability analyses of NRDNP in different time. (A) with natural place; (B) under ultraviolet lamp irradiation.



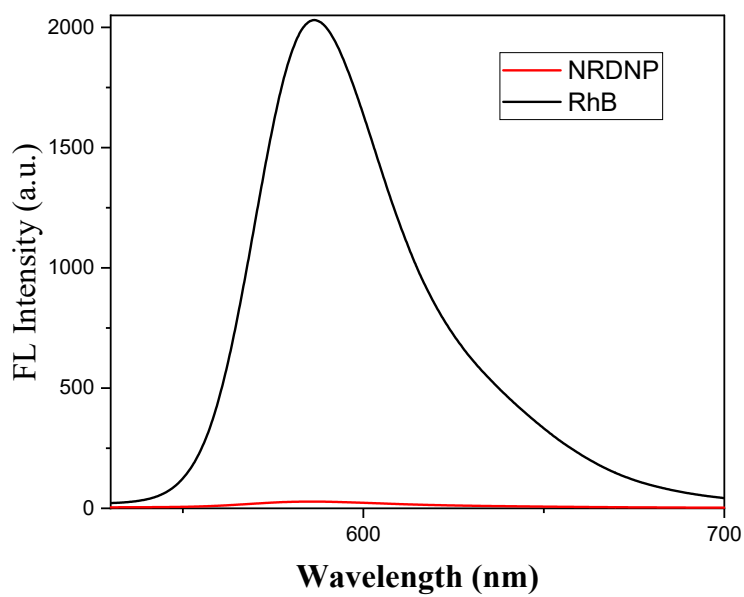

Figure S7. Relative quantum yield of NRDNP ( $\Phi$ ) measurement using Rhodamine B as reference.

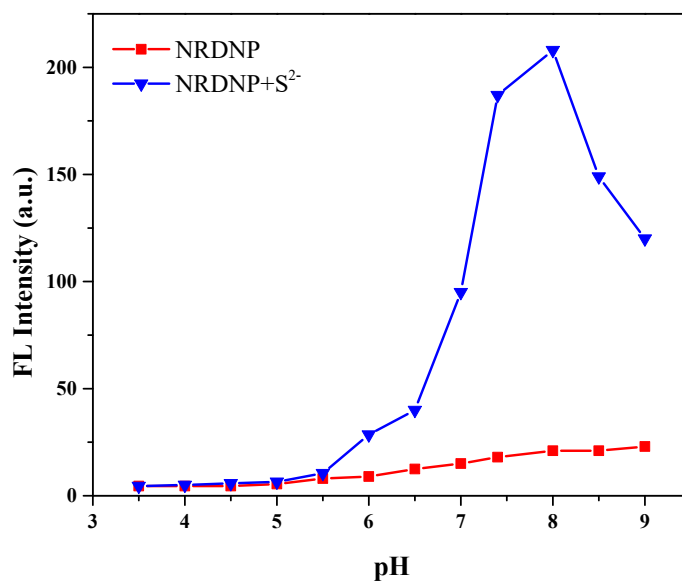

Figure S8. Fluorescence intensity of NRDNP (5  $\mu$ M) with / without Na<sub>2</sub>S (50  $\mu$ M) at 612 nm in different pH conditions.

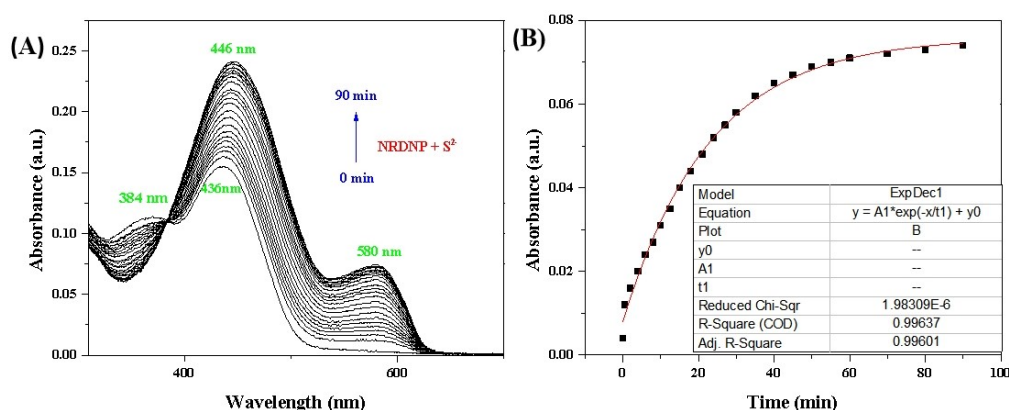

Figure S9. (A) Time dependent absorbance changes of probe NRDNP (10  $\mu\text{M}$ ) with 100  $\mu\text{M}$   $\text{Na}_2\text{S}$  in 10 mM PBS (10 % DMSO with 0.1% CTAB) at pH = 7.4; (B) Pictures of absorbance (A) at 582 nm versus time (t).

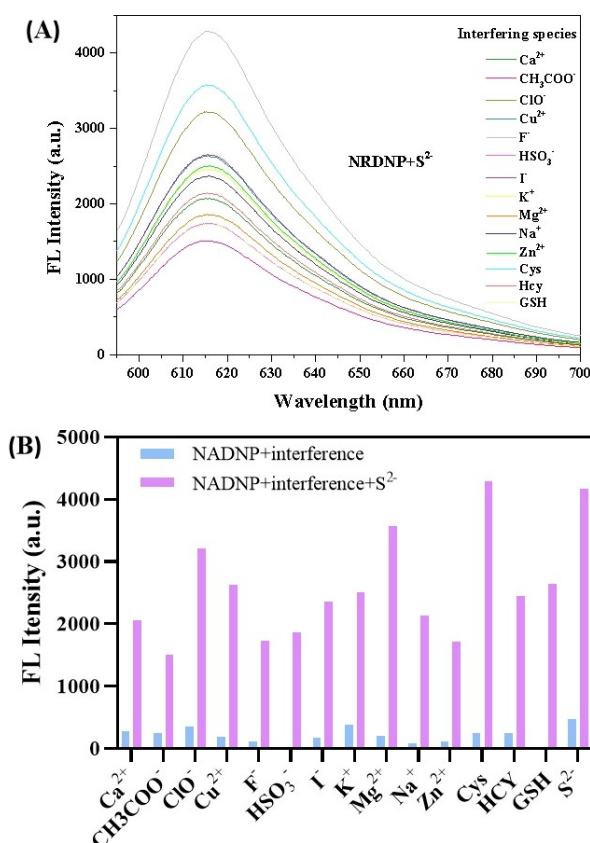

Figure S10 (A) and (B). Fluorescence spectra of NRDNP (2  $\mu\text{M}$ ) upon the addition  $\text{Na}_2\text{S}$  (20  $\mu\text{M}$ ) and 20  $\mu\text{M}$  of various interference species ( $\text{Na}^+$ ,  $\text{K}^+$ ,  $\text{Mg}^{2+}$ ,  $\text{Ca}^{2+}$ ,  $\text{Cu}^{2+}$ ,  $\text{Zn}^{2+}$ ,  $\text{F}^-$ ,  $\text{I}^-$ ,  $\text{OAc}^-$ ,  $\text{ClO}^-$ ,  $\text{HSO}_3^-$ , Cys, GSH, Hcy,  $\text{S}^{2-}$ ), respectively, in DMSO : PBS = 1 : 1 (v/v) ( $\lambda_{\text{ex}} = 582 \text{ nm}$ , slit width: 5 nm/5 nm).

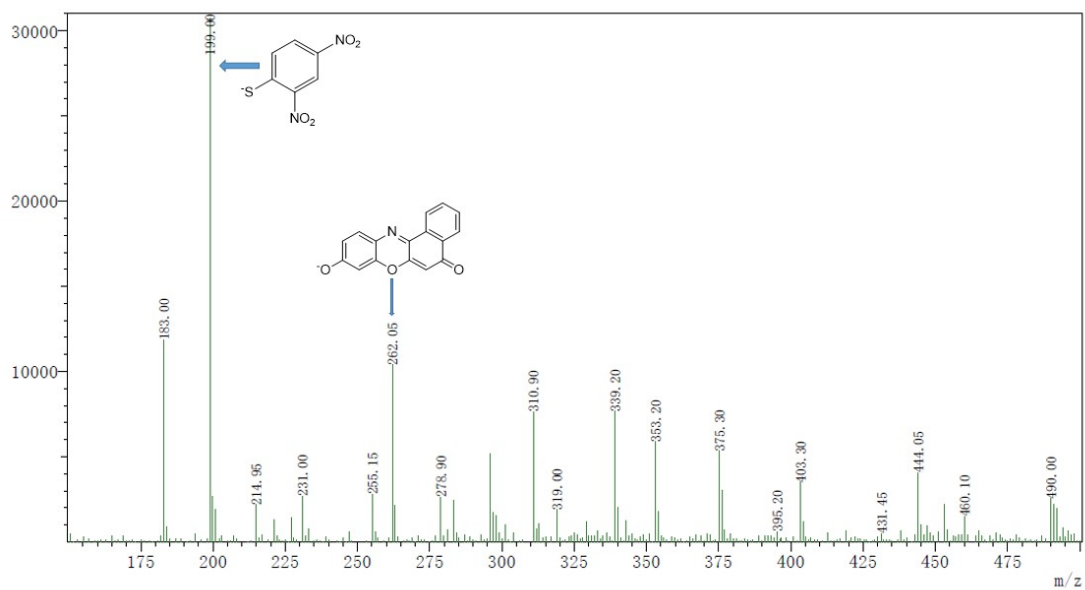

Figure S11. ESI-MS of NRDNP + S<sup>2-</sup> (Negative ion mode).

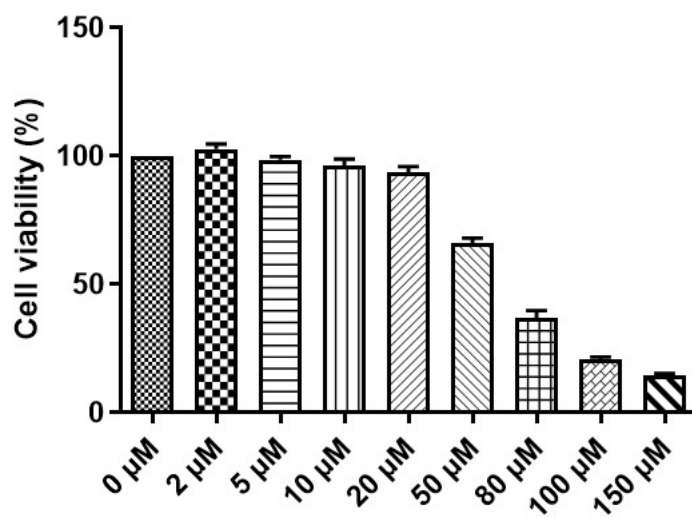

Figure S12. Cell viability was assessed by CCK-8 assay with RAW 264.7 cells after culturing in the presence of 0 -150 μM NRDNP for 24 h.

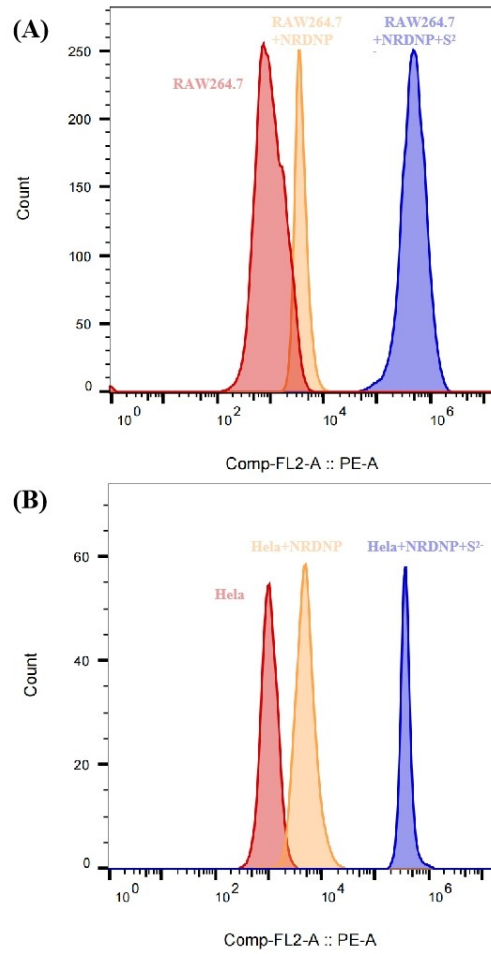

Figure S13. Flow cytometry study of RAW264.7 cells (A) and HeLa cells cells (B). Mock (red), treated without (orange) and with (blue)  $S^{2-}$  in the presence of NRDNP.
